# Supplementary material for: Determination of growth stages and metabolic profiles in Brachypodium distachyon for comparison of developmental context with Triticeae crops
Source: PubMed Central journal article supplement (PMC4528556; doi:10.1098/rspb.2015.0964), 2015-07-22
Supplement: rspb20150964supp10.pdf [file rspb20150964supp10.pdf]

## Stage images

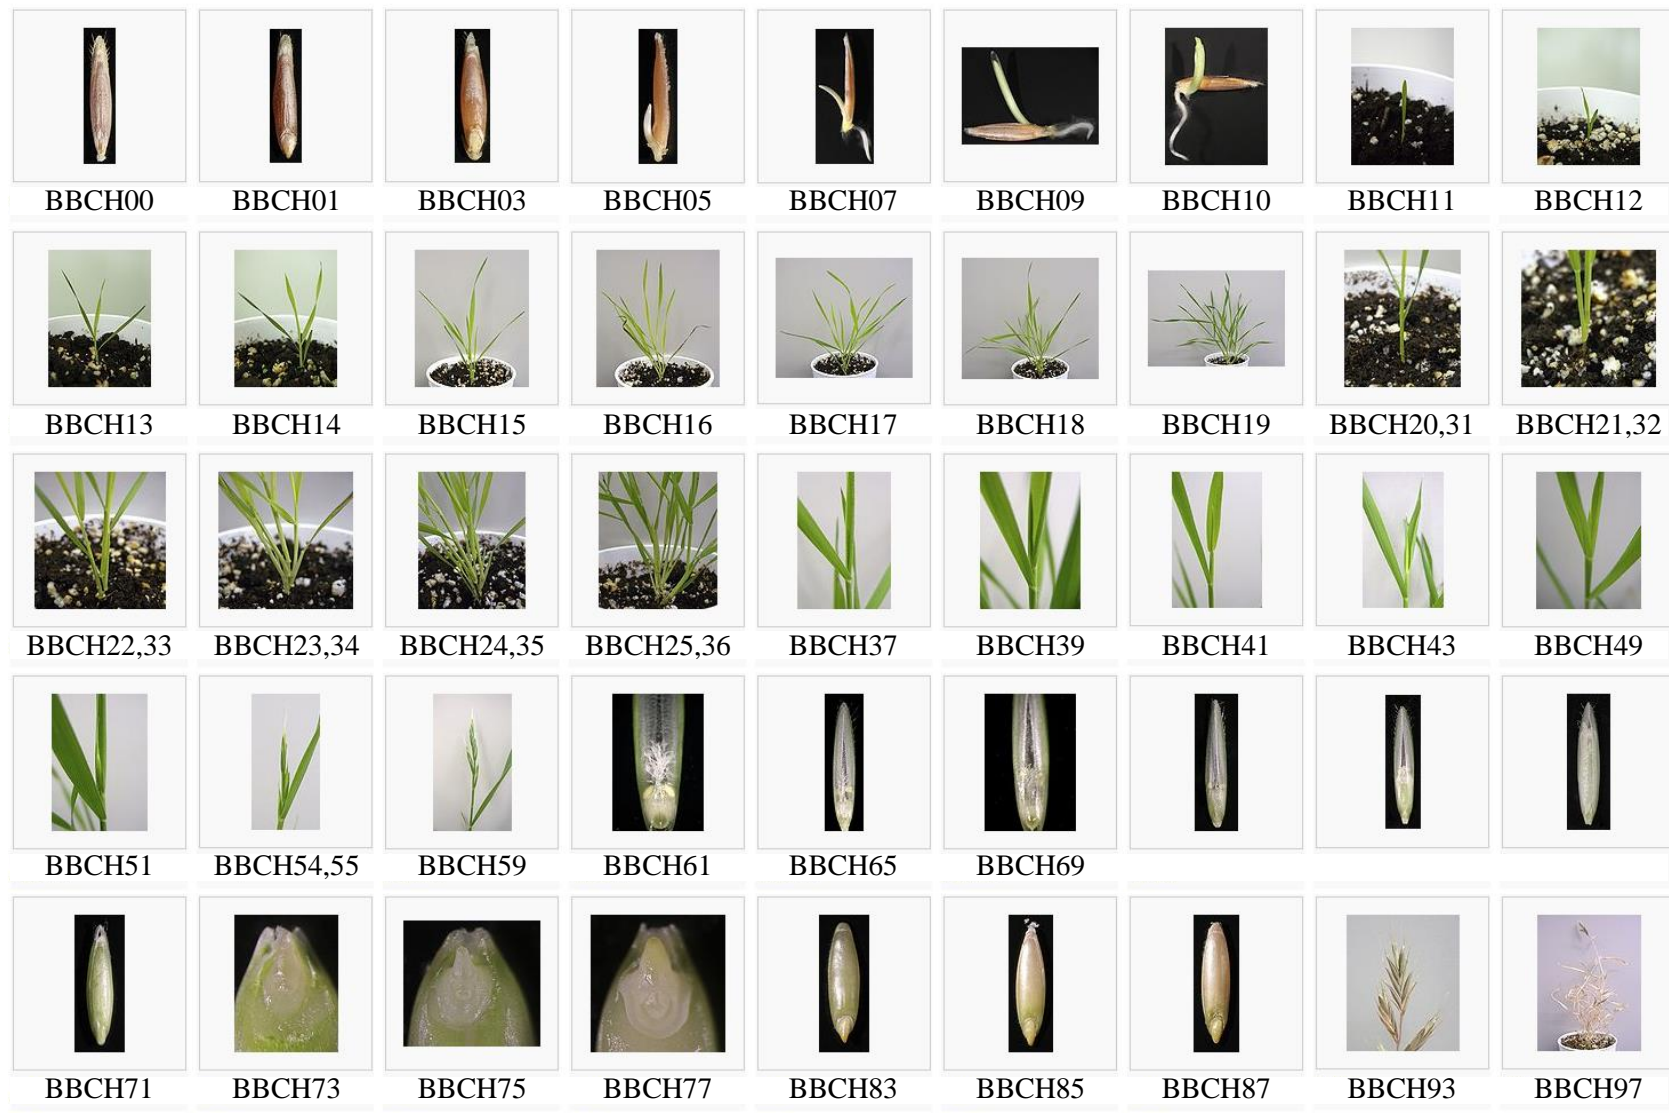

[http://brachypedia.bmep.riken.jp/wiki/index.php/Image\\_library](http://brachypedia.bmep.riken.jp/wiki/index.php/Image_library)
