# Supplementary material for: Determination of growth stages and metabolic profiles in Brachypodium distachyon for comparison of developmental context with Triticeae crops
Source: PubMed Central journal article supplement (PMC4528556; doi:10.1098/rspb.2015.0964), 2015-07-22
Supplement: rspb20150964supp13.pdf [file rspb20150964supp13.pdf]

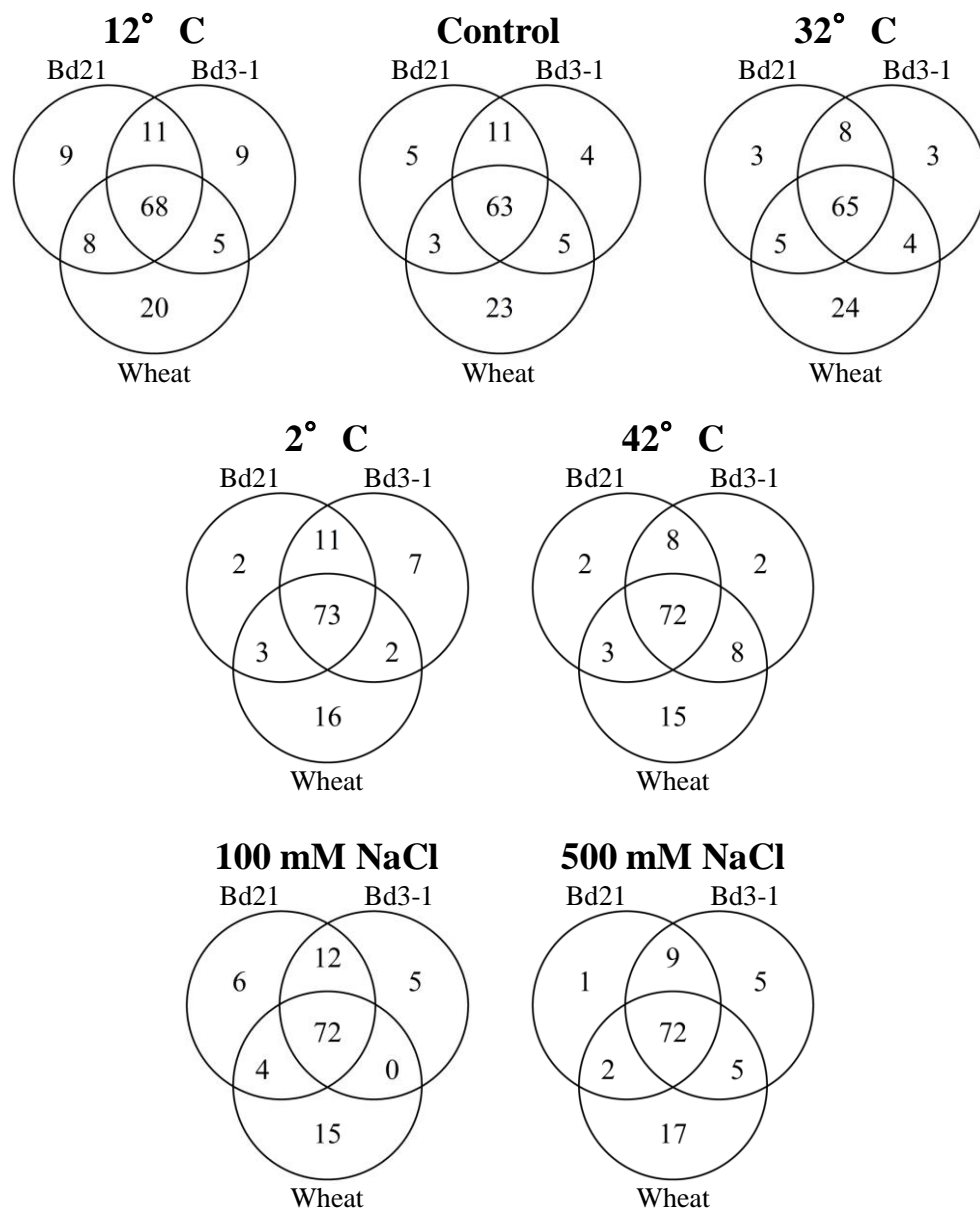

Fig. S5
